# Supplementary material
Source: bioRxiv or medRxiv preprint supplement (https://medrxiv.org/highwire/filestream/94352/field_highwire_adjunct_files/2/2020.08.24.20180745-3.pdf)
Supplement: Supplementary file [file 2020.08.24.20180745-3.pdf]

**Informed consent- for adult above 21yrs**  
**Anxiety and media exposure during COVID-19 outbreak in Kuwait**

**researchers:**

- Dr. Lulua Alasousi

Senior Registrar family medicine, Member of Royal college of General Practitioners MRCGP(Int.),  
Potential trainer at Kuwait family medicine program

- Dr. Sara Alhammouri

Senior Registrar family medicine, Member of Royal college of General Practitioners MRCGP(Int.),  
Potential trainer at Kuwait family medicine program

- Dr. Sara Alabdulhadi

Senior Registrar family medicine, Member of Royal college of General Practitioners MRCGP(Int.),  
Potential trainer at Kuwait family medicine program

**Aim of the study:**

- The purpose of the study is to assess the effect of the media coverage of COVID-19 on mental health and specifically anxiety.
- Participation is voluntary
- If you agree to participate in this study, please answer the following questions which will take 2 minute
- You should understand that even if you agree to participate now, you can withdraw at any time or refuse to answer any question without any consequences of any kind
  - there is no risk or discomfort associated with the study
- All identifying information obtained from this study will be kept strictly confidential and your answers will be anonymous
- you are welcome to ask any question about the survey before you agree tel:97542829 email: luluafalah@me.com

\* 1. Were you diagnosed before with COVID-19 ?

Yes

No

---

\* 2. Are you in quarantine( Home or Institutional)?

Yes

No

\* 3. Are you a health care worker in MOH (doctor/nurse/pharmacist)?

Yes

No

\* 4. DO you have any chronic disease(Diabetes mellitus /hypertension/cancer /  
psychiatric disease ?

Yes

No

\* 5. Do you follow COVID-19 news?

Yes

No

\* 6. Over the last week, how many times you follow COVID-19 news?

- seldom(once aday)
- sometimes(half of the day)
- frequently(all day)

\* 7. sex:

- male
- female

\* 8. age:

- less than 23
- 23-33
- 34-44
- 45-55
- more than 55

\* 9. educational level:

- less than high school
- high school degree or equivalent
- bachelor degree
- post graduate degree

\* 10. martial status:

- married
- single
- widowed
- divorced
- separated

\* 11. Nationality:

- Kuwaiti
- Non kuwaiti

\* 12. employment status :

- |                                           |                                      |
|-------------------------------------------|--------------------------------------|
| <input type="radio"/> not employed        | <input type="radio"/> retired        |
| <input type="radio"/> private employee    | <input type="radio"/> business owner |
| <input type="radio"/> government employee | <input type="radio"/> Student        |

\* 13. goverement:

- |                                 |                                        |
|---------------------------------|----------------------------------------|
| <input type="radio"/> Capital   | <input type="radio"/> Mubark al kabeer |
| <input type="radio"/> Hawalli   | <input type="radio"/> Jahra            |
| <input type="radio"/> Farwanyia |                                        |

\* 14. Over the last 2 weeks, how often have you felt nervous, anxious or on the edge?

- Not at all
- Several days(1-6 day over the last 2 week)
- Over half the days( more than 7 day over the last 2 week)
- Nearly every day

\* 15. Over the last 2 weeks,how often have you been not able to stop or control worrying?

- Not al all
- Several days(1-6 day over the last 2 week)
- Over half the days ( more than 7 day over the last 2 week)
- Nearly every day

\* 16. Over the last 2 weeks, how often have you been worrying too much about different things?

- Not at all
- Several days(1-6 day over the last 2 week)
- Over half the days( more than 7 day over the last 2 week)
- Nearly every day

\* 17. Over the last 2weeks, how often have you been unable to relax ?

- Not at all
- Several days(1-6 day over the last 2 week)
- Over half the days( more than 7 day over the last 2 week)
- Nearly every day



\* 18. Over the last 2 weeks, how often have you felt restless that it is hard to stay still?

- Not at all
- Several days(1-6 day over the last 2week)
- Over half the days( more than 7 day over the last 2 week)
- Nearly every day

\* 19. Over the last 2 weeks, how often did you feel easily annoyed or irritable?

- Not at all
- Several days(1-6 day over the last 2 week)
- Over half the days( more than 7 day over the last 2 week)
- Nearly every day

\* 20. Over the last 2 weeks, how often did you feel afraid as if something awful might happen?

- Not at all
- Several days(1-6 day over the last 2 week)
- Over half the days( more than 7 day over the last 2 week)
- Nearly every day
